# Supplementary material
Source: PubMed Central journal article supplement (PMC10105319)
Supplement: mmc1.pdf [file mmc1.pdf]

# THE LANCET

## Microbe

### Supplementary appendix 1

This translation in Spanish was submitted by the authors and we reproduce it as supplied. It has not been peer reviewed. *The Lancet's* editorial processes have only been applied to the original in English, which should serve as reference for this manuscript.

Los autores nos proporcionaron esta traducción al español y la reproducimos tal como nos fue entregada. No la hemos revisado. Los procesos editoriales de *The Lancet* se han aplicado únicamente al original en inglés, que debe servir de referencia para este manuscrito.

Supplement to: Lai-Ho MacLean E, Villa-Castillo L, Espinoza-Lopez P, et al. Integrating tuberculosis and COVID-19 molecular testing in Lima, Peru: a cross-sectional, diagnostic accuracy study. *Lancet Microbe* 2023; published online April 14. [https://doi.org/10.1016/S2666-5247\(23\)00042-3](https://doi.org/10.1016/S2666-5247(23)00042-3).

# **Integración de pruebas moleculares de tuberculosis y COVID-19 en Lima, Perú: un estudio transversal de precisión diagnóstica**

## **Resumen**

### **Antecedentes**

Las pruebas moleculares integradas podrían ser una oportunidad para detectar y brindar atención tanto para la tuberculosis como para la COVID-19. Muchos países con alta carga de tuberculosis, como Perú, cuentan con sistemas GeneXpert para la tuberculosis con GeneXpert Xpert MTB/RIF Ultra (Xpert Ultra) y el GeneXpert SARS-CoV-2 con el GeneXpert Xpert Xpress SARS-CoV-2 (Xpert Xpress), que están disponibles. Nuestro objetivo fue evaluar la factibilidad de integrar el diagnóstico de tuberculosis y de la COVID-19 utilizando una muestra de esputo con Xpert Ultra y Xpert Xpress en Lima, Perú.

### **Métodos**

En este estudio transversal de precisión diagnóstica, reclutamos adultos que presentaban síntomas clínicos o antecedentes sugestivos de tuberculosis o COVID-19, o ambos. Los participantes fueron reclutados de un total de 35 centros de atención primaria en Lima, Perú. Los participantes proporcionaron un hisopo nasofaríngeo y una muestra de esputo. Para COVID-19, se analizaron las muestras de hisopos nasofaríngeos y las muestras de esputo usando Xpert Xpress; para tuberculosis, se usó la muestra esputo mediante cultivo y Xpert Ultra. Comparamos la precisión diagnóstica de las pruebas de esputo usando Xpert Xpress con hisopo nasofaríngeo en pruebas con Xpert Xpress. Se consideró a las personas con resultados positivos de hisopado nasofaríngeo Xpert Xpress como COVID-19 positivo, y un cultivo positivo como caso de tuberculosis positivo. Para evaluar la integración de las pruebas, la proporción de casos identificados en el esputo por Xpert Xpress se comparó con Xpert Xpress en hisopos nasofaríngeos, y el esputo por Xpert Ultra se comparó con el cultivo.

### **Resultados**

Entre el 11 de enero de 2021 y el 26 de abril de 2022, se reclutaron a 600 participantes (312 [52 %] mujeres y 288 [48 %] hombres). La prevalencia de tuberculosis en el estudio fue del 13 % (80 participantes, IC 95 % 11–16) y del SARS-CoV-2 fue del 35 % (212 participantes, IC 95% 32–39). Entre los casos de tuberculosis, 13 (2.2%, 1.2–3.7) participantes dieron positivo al mismo tiempo para SARS-CoV-2. En cuanto al rendimiento diagnóstico de las pruebas integradas, Xpert Ultra detectó el 96 % (89–99) de cultivo confirmado casos de tuberculosis (n=77) y Xpert Xpress-sputum detectó el 67 % (60–73) de los casos de COVID-19 (n=134). Los cinco miembros del personal del estudio informaron que las pruebas moleculares integradas fueron fáciles y aceptables.

### **Interpretación**

El rendimiento diagnóstico de Xpert Xpress en esputo fue moderado, pero integró pruebas para tuberculosis y COVID-19 con GeneXpert fue factible. Sin embargo, las pruebas sistemáticas para ambas enfermedades podrían no ser lo ideal para todas las personas que presentan presunción de tuberculosis o COVID-19, ya que los casos positivos concurrentes eran raros durante el periodo de estudio. Estudios futuros podrían ayudar a identificar cuándo las pruebas integradas son más valiosas y su implementación pueda ser óptima.
