# Supplementary material
Source: PubMed Central journal article supplement (PMC10105319)
Supplement: mmc2.pdf [file mmc2.pdf]

# THE LANCET Microbe

## Supplementary appendix 2

This appendix formed part of the original submission and has been peer reviewed. We post it as supplied by the authors.

Supplement to: Lai-Ho MacLean E, Villa-Castillo L, Espinoza-Lopez P, et al. Integrating tuberculosis and COVID-19 molecular testing in Lima, Peru: a cross-sectional, diagnostic accuracy study. *Lancet Microbe* 2023; published online April 14. [https://doi.org/10.1016/S2666-5247\(23\)00042-3](https://doi.org/10.1016/S2666-5247(23)00042-3).

## **APPENDIX**

### **Integrating tuberculosis and COVID-19 molecular testing in Lima, Peru: A cross-sectional diagnostic accuracy study**

Emily Lai-Ho MacLean, Luz Villa-Castillo, Patricia Espinoza-Lopez, Tatiana Caceres, Giorgia Sulis, Mikashmi Kohli, Madhukar Pai, César Ugarte-Gil

#### **CONTENTS**

2 – Supplemental methods: Study design and population

2 – Supplemental methods: Procedures

2 – Supplemental methods: Semi-structured interview questions

4 – Supplemental results: Table S1: Test result patterns among 80 people with culture-confirmed TB.

4 – Supplemental results: Table S2: Unavailable results for molecular tests for SARS-CoV-2 detection

5 – References

## SUPPLEMENTAL METHODS

### Study design and population

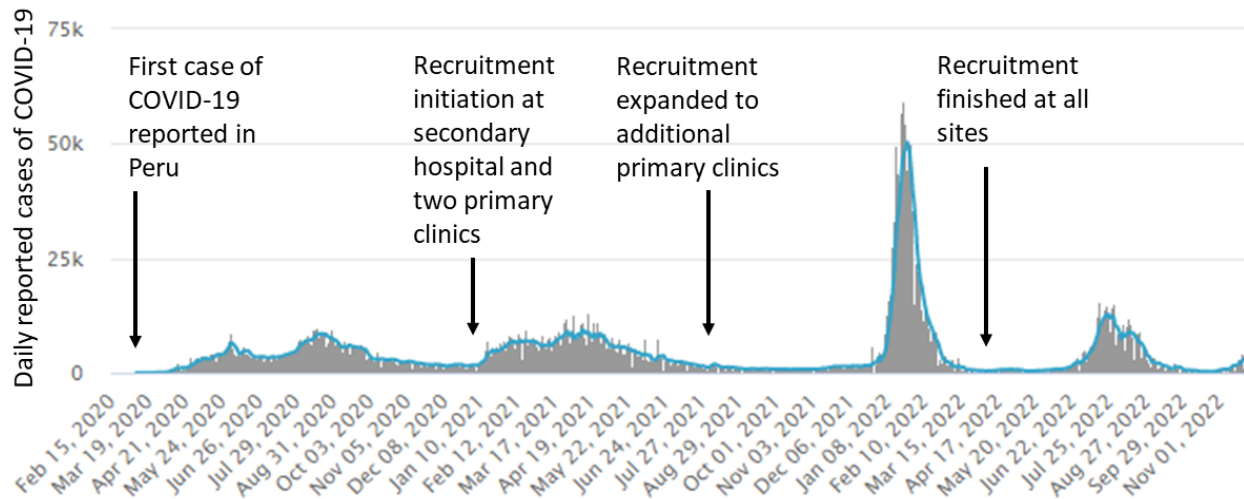

**Figure S1:** Number of weekly incident COVID-19 cases in Peru between February 15 2021 and 23 November 2022. The blue line represents weekly average. Modified from<sup>1</sup>.

### Procedures

NPSs were transported via approximately 3 mL of transport media (VTM Swab Kit [Boenmed, China], AB Transport Medium [AB Medical, Korea], or VTM transport medium [Liofilchem, Italy], depending on availability). 300  $\mu$ L was used for testing on Xpress as per manufacturer’s protocol (LOT numbers: 1000224306, 1000265143). Xpress primers target the nucleocapsid gene N2 and E gene, the envelope protein E.<sup>2</sup> In the UPCH system, another RT-PCR test using NPS was the standard-of-care for SARS-CoV-2 detection. However, due to its superior analytical sensitivity, we considered a positive result on Xpert Xpress SARS-CoV-2 using NPS to be indicative of SARS-CoV-2 infection.

The 5 mL sputum sample was homogenized using glass beads and split. For TB testing, 1 mL was used for Ultra, while for COVID-19, 300  $\mu$ L was run on Xpress. The remaining sputum was decontaminated with the NALC-NaOH method; this sample was used for smear microscopy and bacteriologic culture (BACTEC MGIT, BD, USA), with positive tests undergoing drug-susceptibility testing with DST SIRE (BD).

Participants recruited at primary health clinics received chest X-rays on-site; other individuals were referred to private clinics and given a voucher to recoup costs of the procedure. Chest X-rays were read by a blinded physician experienced in reading radiographic images. Chest X-ray abnormalities were classified as “presence of abnormality” or “no abnormality”.

### Semi-structured interview questions

Questions regarding feasibility and experience of integrated testing were posed to staff members in informal semi-structured interviews.

Questions for discussion with clinical staff involved in recruitment:

- How did you find collecting samples for COVID-19 and TB testing at the same time? What did patients think?

- What did you think about collecting a nasopharyngeal swab from someone seeking TB testing? Would you consider it feasible?
- What did you think about collecting sputum from someone seeking COVID-19 testing? Would you consider it feasible?
- Were any special safety considerations incorporated? Please describe if so

Questions for discussion with laboratory staff involved in running tests:

- How did you find the experience of using GeneXpert for COVID-19 testing as well as TB testing? Was it feasible?
- What was different about sample preparation procedures to perform the integrated testing? Please describe any differences (or not)
- What was the impact on laboratory work flow?
- Were any special safety considerations incorporated? Please describe if so

## SUPPLEMENTAL RESULTS

**Table S1:** Test result patterns among 80 people with culture-confirmed TB. The number of times the test result pattern was observed is indicated in the right-most column. “+” denotes a positive test result and “-” denotes a negative test result. NPS – nasopharyngeal swab; Xpress – Xpert Xpress SARS-CoV-2

| Test results |                              |                                 | Observed frequency |
|--------------|------------------------------|---------------------------------|--------------------|
| Culture      | Xpress on NPS for SARS-CoV-2 | Xpress on sputum for SARS-CoV-2 |                    |
| +            | -                            | -                               | 67                 |
| +            | -                            | +                               | 2                  |
| +            | +                            | -                               | 9                  |
| +            | +                            | +                               | 1                  |
| +            | +                            | NA                              | 1                  |

**Table S2:** Unavailable results for molecular tests for SARS-CoV-2 detection. NPS – nasopharyngeal swab; Xpress – Xpert Xpress SARS-CoV-2.

|                                  | Xpress (NPS) | Xpress (sputum) |
|----------------------------------|--------------|-----------------|
| <b>Error</b>                     | 0            | 3               |
| <b>Indeterminate result</b>      | 0            | 0               |
| <b>No result</b>                 | 0            | 1               |
| <b>Missing result</b>            | 1            | 10              |
| <b>Total unavailable results</b> | 1            | 14              |

## SUPPLEMENTAL REFERENCES

1. Worldometers.info. Worldometer: Peru dashboard. 6 July 2022 2022.  
<https://www.worldometers.info/coronavirus/country/peru/> (accessed 6 July 2022).
2. Cepheid. Instructions for use: Xpert® Xpress SARS-CoV-2. In: Inc. C, editor. Sunnyvale, USA: Cepheid Inc.; 2020.
